# Supplementary material for: Impact of nutritional supplementation during pregnancy on antibody responses to diphtheria-tetanus-pertussis vaccination in infants: A randomised trial in The Gambia
Source: PubMed Central journal article supplement (PMC6684039; doi:10.1371/journal.pmed.1002854), 2019-08-06
Supplement: pmed.1002854.s004.pdf [file pmed.1002854.s004.pdf]

20<sup>th</sup> August 2008

Dr Sophie Moore  
Head of Station  
MRC Kenaba

Dear Dr. Moore

**Re: SCC 1126v2. 21<sup>st</sup> July 2008. A randomized trial to investigate the effects of prenatal and infancy nutritional supplementation on infant immune development.**

Thank you for your response to the concerns raised by the Ethics Committee on your study to investigate the effects of prenatal and infancy nutritional supplementation on infant immune development.

We have noted your confirmation that as part of the Trial Monitoring/GCP requirements for such a trial, you will set up a Data and Safety Monitoring Committee for whom un-blinded results on outcomes will be made available. We are also pleased to note that you have already consulted Dr Jenny Mueller, Clinical Trials Support Manager, MRC Fajara, regarding the study design and that she is providing helpful input into the monitoring aspects required.

This proposal now has our Committee's full approval to proceed.

Best wishes

Yours sincerely

  
Mr. Malcolm Clarke  
Chairman, Gambia Government/MRC Joint Ethics Committee

**The Gambia Government / MRC Laboratories Joint Ethics Committee:**

*Mr Malcolm Clarke, Chairman  
Mrs Kathy Hill, Secretary  
Mrs Norwoh Ali, 2<sup>nd</sup> Secretary  
Professor Ousman Nyan, Scientific Advisor  
Mr Dawda Jagne  
Mrs Bertha Mboge  
Mr. Modou Phall*

*Professor Tumani Corrah  
Professor Hilton Whittle  
Dr Stephen Howie  
Dr Mariatou Jallow  
Dr. Lamin Sidibeh  
Mr. Malamin Sonko*
